# Supplementary material for: Alteration of intracellular protein expressions as a key mechanism of the deterioration of bacterial denitrification caused by copper oxide nanoparticles
Source: PubMed Central journal article supplement (PMC4623765; doi:10.1038/srep15824), 2015-10-28
Supplement: srep15824-s1.pdf [file srep15824-s1.pdf]

## **Supplementary Information**

### **Alteration of intracellular protein expressions as a key mechanism of the deterioration of bacterial denitrification caused by copper oxide nanoparticles**

Yinglong Su, Xiong Zheng\*, Yinguang Chen\*, Mu Li, Kun Liu

*(State Key Laboratory of Pollution Control and Resource Reuse, School of Environmental Science and Engineering, Tongji University, 1239 Siping Road, Shanghai 200092, China)*

\*Corresponding author

Tel.: +86 21 65981263

Fax: +86 21 65986313

E-mail: yg2chen@yahoo.com (Y.C.); xiongzhen@tongji.edu.cn (X.Z.)

## Supplementary Methods

**Copper Ion Dissolution from CuO NPs and Cu<sup>2+</sup> Toxicity Test.** To determine the released Cu<sup>2+</sup> from CuO NPs, 0.05, 0.1 and 0.25 mg/L CuO NPs were prepared in the mineral media according to the similar procedure of the exposure experiment, and the only difference was the absence of bacteria in media. After settled in the shaker, the nanoparticles suspensions were gotten and then centrifuged at 14000 rpm for 10 min, and the supernatant was taken for dissolved copper ions detection by inductively coupled plasma mass spectrometry (ICP-MS, Agilent Technologies, Santa Clara, CA). After the determination of dissolved Cu<sup>2+</sup>, the ion toxicity test was conducted. Denitrifying bacteria were exposed to corresponding Cu<sup>2+</sup> in media, and the concentrations of NO<sub>3</sub><sup>-</sup>-N, NO<sub>2</sub><sup>-</sup>-N and N<sub>2</sub>O were measured every 4 h. After 24 h exposure, the cell viability and denitrifying enzyme activities were determined by respective assays. All the procedures were similar to the CuO NPs toxicity test.

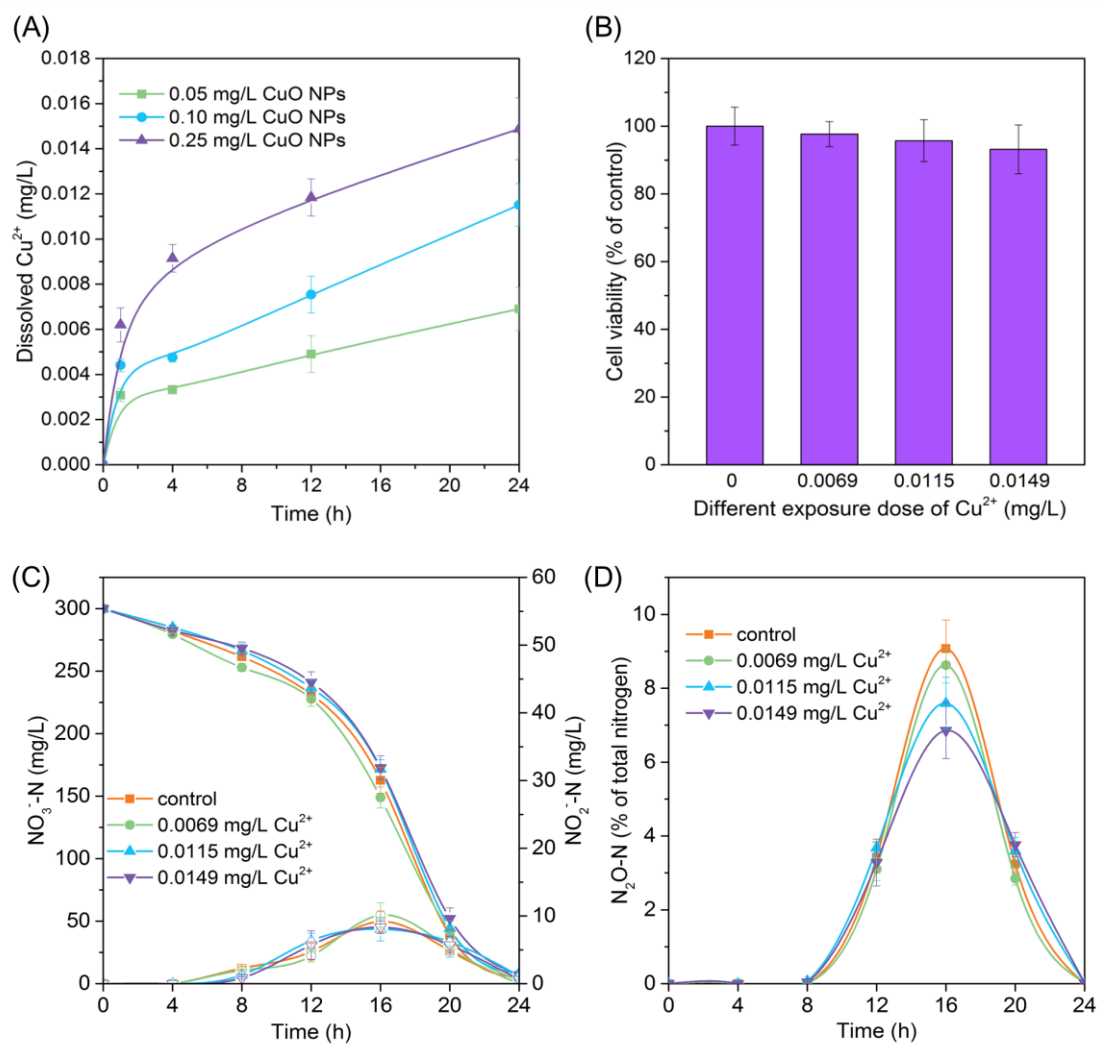

**Figure S1. Dissolution of copper ion from CuO NPs at different concentrations (A); The potential effects of dissolved  $\text{Cu}^{2+}$  on nitrate removal efficiency and cell viability of *P. denitrificans* after 24 h exposure (B); Effects of  $\text{Cu}^{2+}$  on the variations of  $\text{NO}_3^-$ -N (solid, C),  $\text{NO}_2^-$ -N (hollow, C) and  $\text{N}_2\text{O}$ -N (D) during 24 h exposure tests. Error bars represent standard deviations of triplicate measurements.**

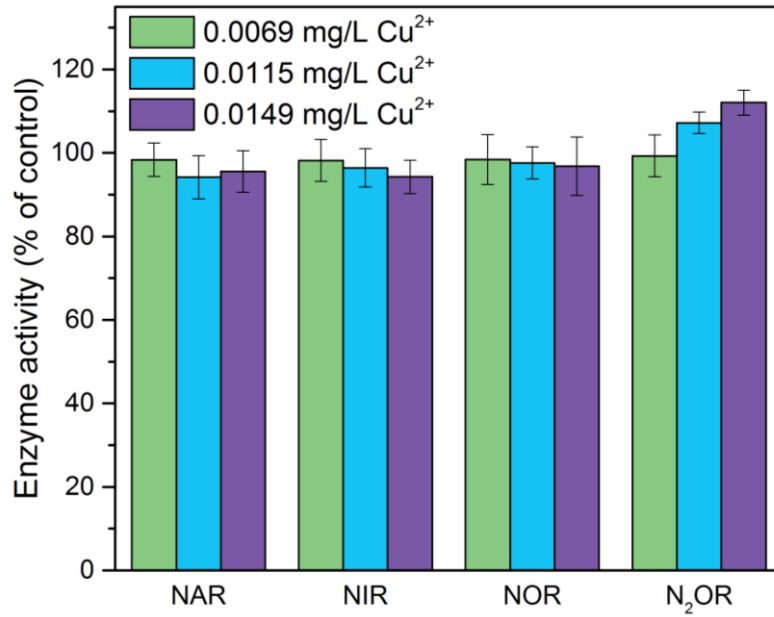

Figure S2. The effects of Cu<sup>2+</sup> exposure on the activities of NAR, NIR, NOR, and N<sub>2</sub>OR at time of 24 h. Error bars represent standard deviations of triplicate measurements

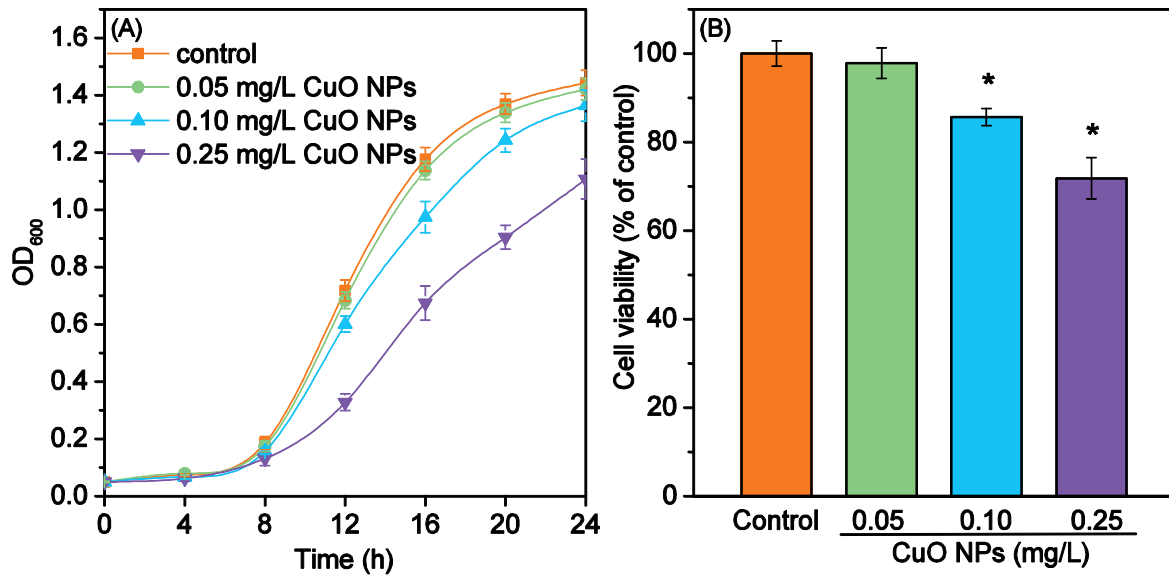

Figure S3. The growth of *Paracoccus denitrificans* exposed to different dose CuO NPs (A), and the relative viability of *P. denitrificans* after 24 h of CuO NPs exposure (B).

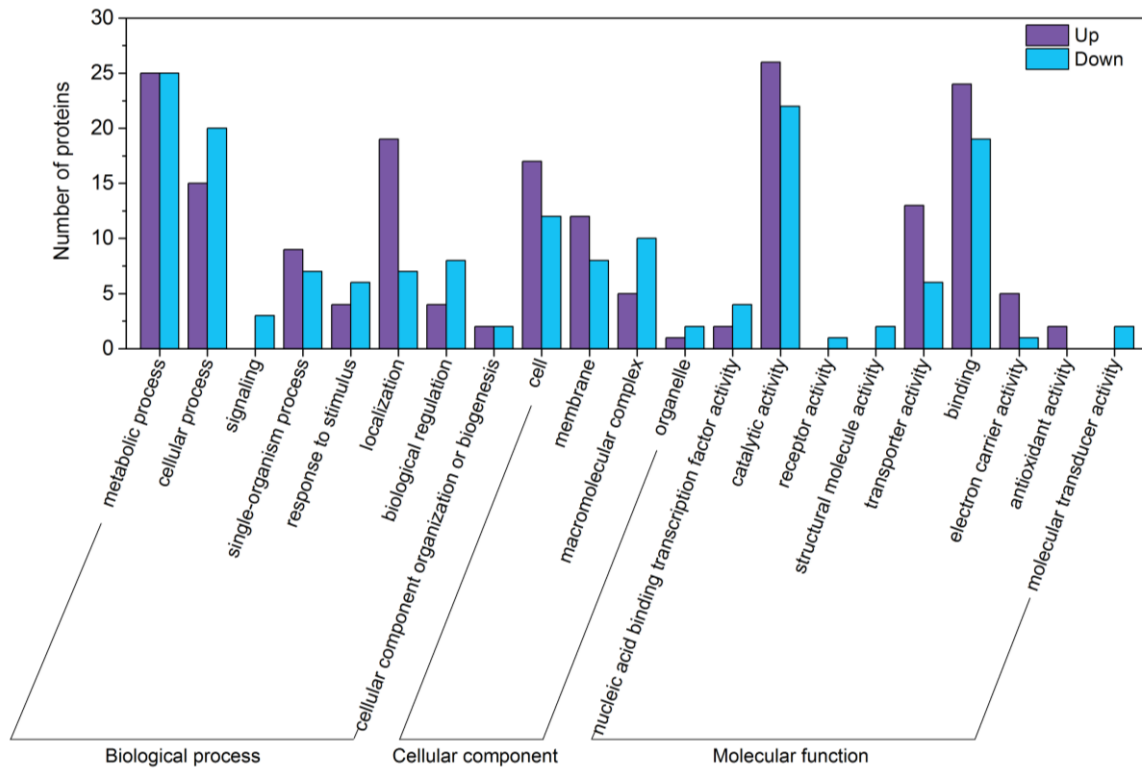

**Figure S4.** Classification of identified differential proteins of *P. denitrificans* with or without CuO NPs exposure according to gene ontology annotation in molecular function, cellular components and biological processes. The bars in figure represent the ratio of protein differences between the CuO NPs treatment and control.

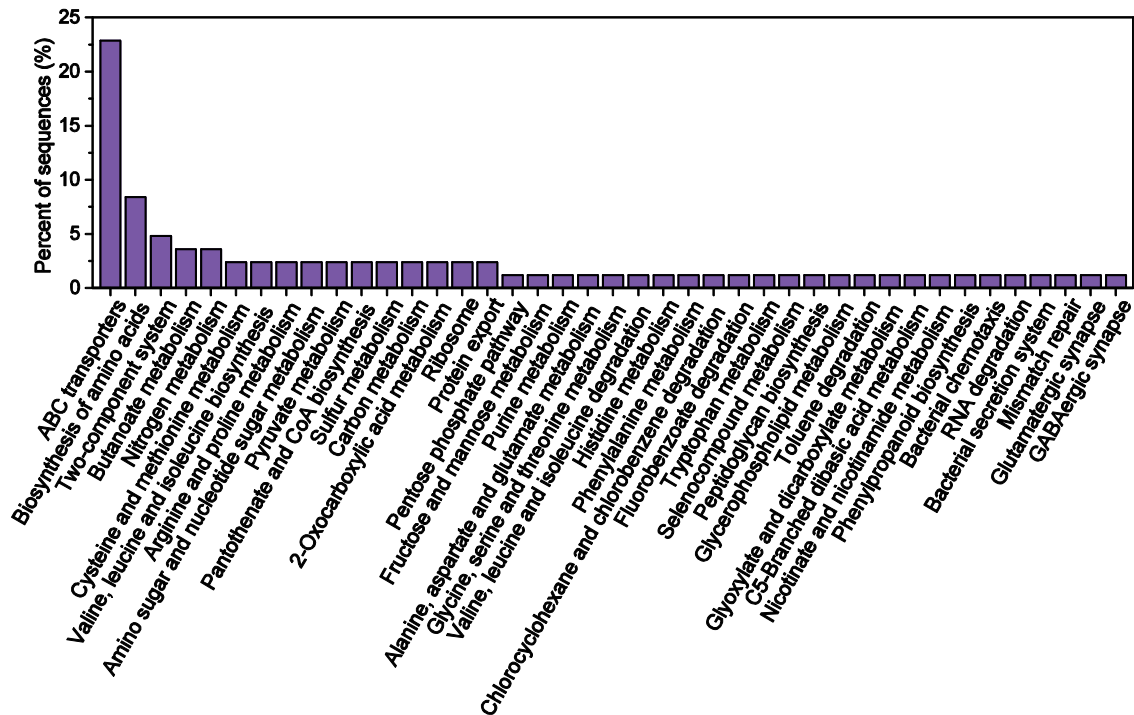

**Figure S5.** Functional classification of differentially expressed proteins of *P. denitrificans* under CuO NPs stress. The classification is based on KEGG (<http://www.kegg.jp/kegg/pathway.html>).

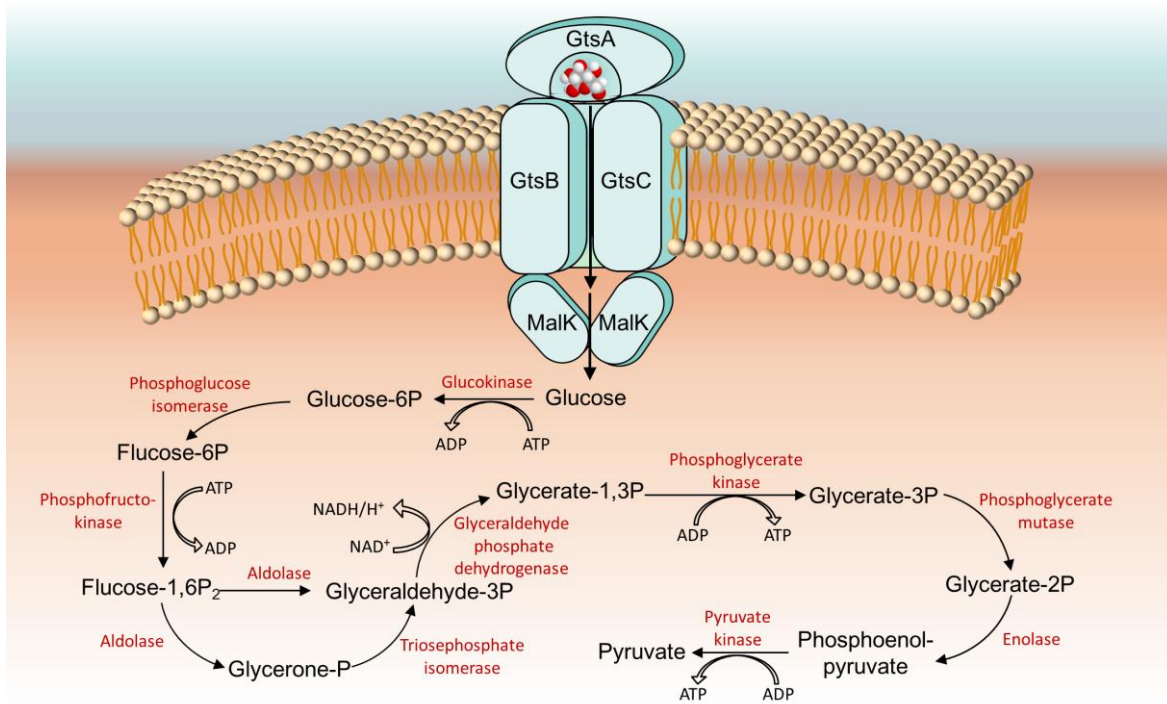

**Figure S6.** The schematic diagram of transport and intracellular metabolism of glucose.

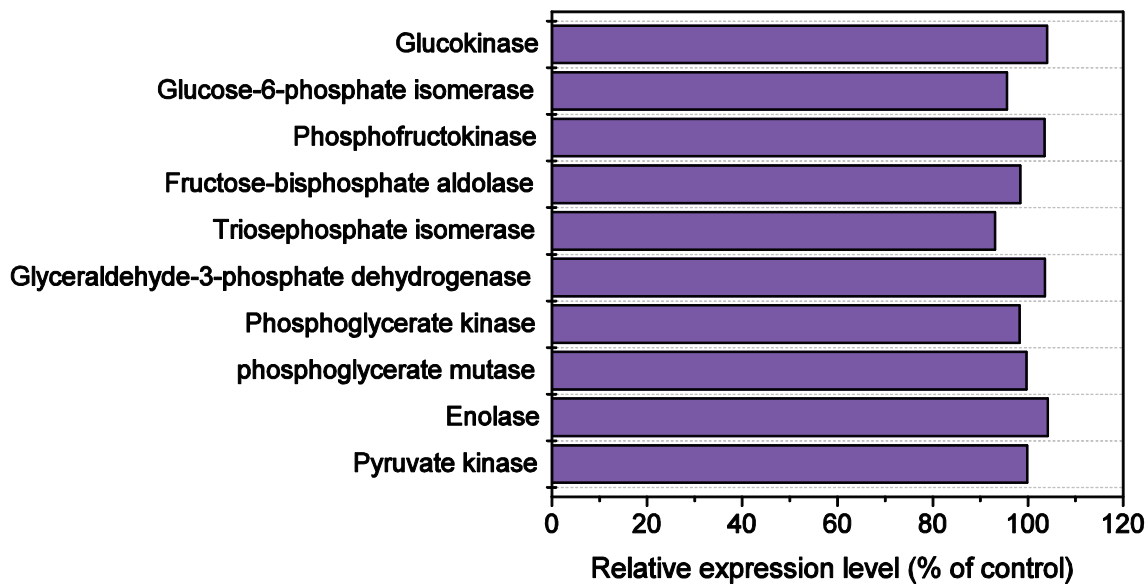

**Figure S7.** Effect of 0.25 mg/L CuO NPs on the relative expressions of proteins involved in glycolysis process.

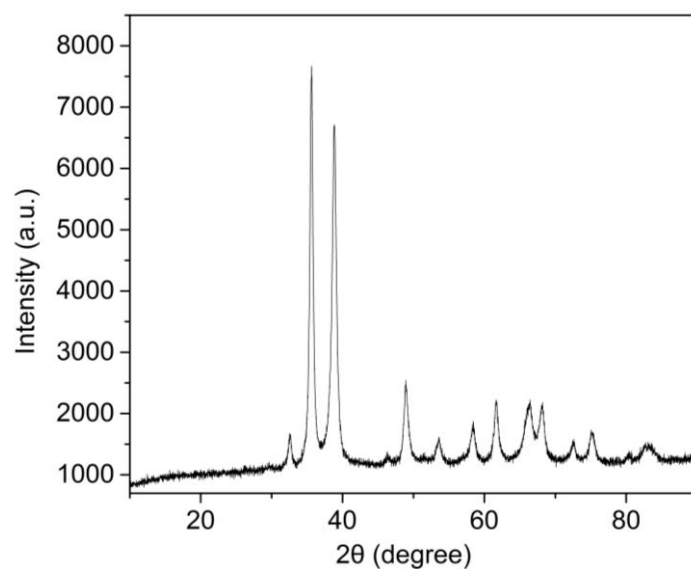

**Figure S8.** X-ray diffraction (XRD) pattern of CuO NPs.

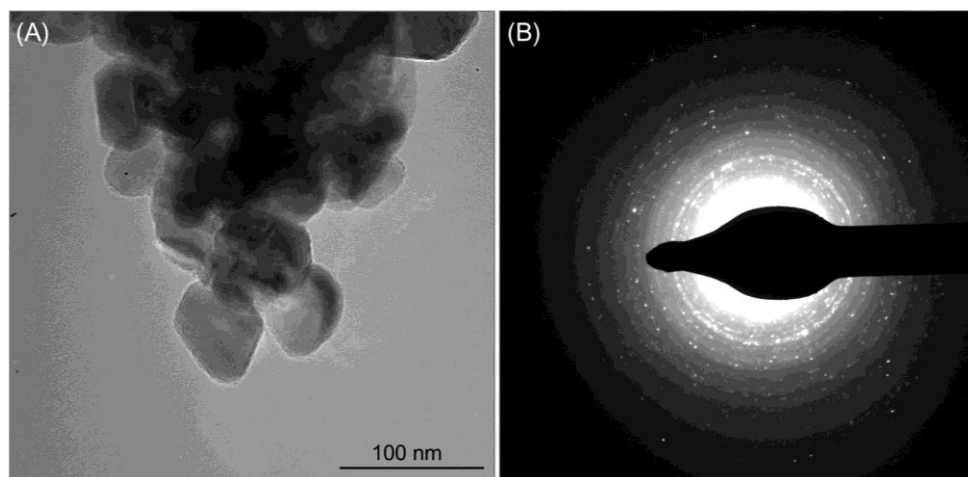

**Figure S9.** TEM images of CuO NPs (A) and the selected area electron diffraction (SAED) pattern (B) of the nanoparticles in A. These images confirmed the CuO NPs and provided the diameter.

**Table S1. Relative expressions of differential proteins induced by 0.25 mg/L CuO NPs and the corresponding sequences of peptides in the MRM quantification.**

| <b>Protein accession</b> | <b>Protein name</b>                                          | <b>Relative expression<sup>a</sup></b> | <b>p value</b> | <b>Sequences of peptides in the MRM quantification</b> |
|--------------------------|--------------------------------------------------------------|----------------------------------------|----------------|--------------------------------------------------------|
| A1B7I2                   | GtsB, Carbohydrate ABC transporter membrane protein 1        | 0.80                                   | 0.019          | AAQVDGIPTHR<br>YEFEGIGQYER                             |
| A1B7I1                   | GtsA, Carbohydrate ABC transporter substrate-binding protein | 1.057                                  | 0.072          | GYVDDNFSGR<br>VLSGNAPTAVQLK                            |
| A1B7I4                   | MalK, Carbohydrate ABC transporter ATP-binding protein       | 0.949                                  | 0.067          | EGAAPLVITDPPVAR<br>QLQIEPLLAR                          |
| A1B7I3                   | GtsC, Carbohydrate ABC transporter membrane protein 2        | 0.923                                  | 0.058          | TGSLLSLPR<br>NYYVTIPQELVR                              |
| A1B6B9                   | FhuD, Periplasmic binding protein                            | 0.606                                  | 0.002          | ELAQIFDVEER<br>EPQLVTTQFEFHVGPQGAVGTR                  |
| A1B9V6                   | Respiratory nitrate reductase alpha subunit                  | 0.847                                  | 0.026          | DYDADVPFTPAAWAER<br>GGPVVWISEIDAR                      |
| A1B9V5                   | Respiratory nitrate reductase beta subunit                   | 0.825                                  | 0.013          | EIVEDAYDLR<br>TLDGVVNLGVAK                             |
| Q51700                   | Nitrite reductase                                            | 0.708                                  | 0.001          | DQESALVVVDDK<br>SVLDTGYAVHISR<br>AQAEADGVDIDNWTEEVIR   |
| A1B9T9                   | Nitrous-oxide reductase                                      | 1.67                                   | 0.003          | LSPTVTVLDVTR<br>SAVVAEPELGLGPLHTAFDGR                  |
| A1B311                   | Cytochrome c, class I                                        | 0.535                                  | 0.011          | AHGGDWTPEALQEFLTNPK                                    |
| P13627                   | Cytochrome c1                                                | 0.844                                  | 0.041          | TLADEGGPQLPEDQVR                                       |
| P05417                   | Ubiquinol-cytochrome c reductase iron-sulfur subunit         | 0.857                                  | 0.035          | EVDLGLQIDR<br>GPAPQNLHIPVAEFLDDTTIK                    |
| A1BAG3                   | Electron transport protein SCO1/SenC                         | 0.66                                   | 0.022          | LTATDGTEFSQAALK<br>TGSGSGSVADAGAAALGR<br>VFFVTVDPER    |
| P38974                   | Electron transfer flavoprotein subunit alpha                 | 0.886                                  | 0.025          | AAVDSGYAPNDWQVGQTGK<br>ESFAIIEELADK                    |
| A1AZY8                   | NADH: flavin oxidoreductase/NADH oxidase                     | 0.788                                  | 0.044          | FPLEVFEAVR<br>LFEPIAIGGQTLANR                          |

<sup>a</sup> It was calculated by dividing the protein expression exposed to 0.25 mg/L CuO NPs by that in the control.
